# Supplementary material for: Zebrafish RNase T2 genes and the evolution of secretory ribonucleases in animals
Source: PubMed Central journal article supplement (PMC2720953; doi:10.1186/1471-2148-9-170), 2009-07-20
Supplement: 1471-2148-9-170-S1.pdf [file 1471-2148-9-170-S1.pdf]

**Supplemental Dataset: mRNA and protein sequences of zebrafish RNase T2 genes**

**RNase Drel short mRNA**

>RNase\_Drela

GATATCACAGACTCTCAGAACCCACTGATCAGCATGACCTACAATAAACACATTCTCTGG  
GCCTTTACCGCTGCTCTGGCCACAGGTTGGGTCCTTAGTAATGATGAAGGATGCTATTAT  
GGGACTGTCATGAAGCACTCATGCAACTGGACTTGTATGCTGCTCACTCTTCAATGGCCT  
GGAAGTTTCTGTATAGGTCTTACTAATAAAAACGATTTGCAAATACCCTGACTATTCAA  
AACTGGACCATCCATGGCCTATGGCCGATGCATACAGGTCCTGCTGTAAGTGTGGCCA  
ATATTTTCATTCCACCTTCAGGAAATCGAGCCAGAACTCACTCAGCTGTGGCCATCTTTA  
ATAAAAGGAAAGCATTCTTCAACTTTTGGAGGGAGGAATGGATTAAACACGGGACGTGT  
GCTGGCTGTGACGGGGCCATGGGTTCCACCGCTTCTTTACTTCCAGGCTGCAGTCAAGCTT  
CGAAAACCTCTTTGACATTAATAGCGTCTTGGAAAGCTCTGGAATCAAAGCCTCATGTGAG  
GTGTCCTATAAGTATGACGACATAAGCAAGGCCCTGACCTCACTGCTGGGAGACAACCTT  
GATTTGCAATGTGTGACTGACAGTAAGGGTCGTGAAGCATGGATCCAGCTGAAGATCCAT  
CTTTTCGAGGAACCAAACCATTTGGATGCCCCACAGAGAAGCAAGACGAAGCATTCTATAAT  
TTAGCGTGGTATAAAAGCCCTGGACATCCTTGTCCGAAGAACACCACCATCTTTTTTGT  
CCAATTAACATATGACAATCCTCATGAGCCATGT

**RNase Drel protein encoded by short mRNA**

>RNase\_Drela

MTYNKHILWAFTAALATGWVLSNDEGCYYGTVMKHSCNWTCLLLTLQWPGSFCIGLTNKT  
ICKIPLTIQNWTIHGLWPMHTGHCCNCWPIFHSHLQEIPELTQLWPSLIKHKHFFNFWR  
EEWIKHGTGAGCDGAMGSPLLYFQAAVKLRKLFIDINSVLESSGIKASCEVSYKYDDISKA  
LTSLLGDNFDLQCVTDSKGREAWIQLKIHLSRNQTIGCPTEKQDEAFYNLAWYKSPGHPC  
PKNTTIFVVPINYNPHEPC

**RNase Drel long mRNA**

>RNase\_Drelb

GATATCACAGACTCTCAGAACAGACGGATCAGCATGACCTACAGTAAGAATCTACCTGAA  
TAGCTATATAACCTCTGTTTAAATGCATATTTACTGTAACAATCTGTATTGTTTTAGATA  
AACACATTCTCTGGGCCTTTACCGCTGCTCTGGCCACAGGCTGGGTCCTTAGTAATGATG  
AAGGATGCTATTATGGGACTGTCATGAAGCACTCATGCAACTGGACTTGTATGCTGCTCA  
CTCTTCAATGGCCTGGAAGTTTCTGTATAGGTCTTACTAATAAAAACGATTTGCAAATAC  
CACTGACTATTCAAACCTGGACCATCCATGGCCTATGGCCGATGCATACAGGTCCTGCT  
GTAAGTGTGGCCAATATTTTCATTCCACCTTCAGGAAATCGAGCCAGAACTCACTCAGC  
TGTGGCCATCTTTAATAAAAAGGAAAGCATTCTTCAACTTTTGGAGGGAGGAATGGATTA  
AACACGGGACGTGTGCTGGCTGTGACGGGGCCATGGGTTCCACCGCTTCTTTACTTCCAGG  
CTGCAGTCAAGCTTCGAAAACCTCTTTGACATTAATAGCGTCTTGGAAAGCTCTGGAATCA  
AAGCCTCATGTGAGGTGTCCTATAAGTATGACGACATAAGCAAGGCCCTGACCTCACTGC  
TGGGAGACAACCTTTGATTTGCAATGTGTGACTGACAGTAAGGGTCGTGAAGCATGGATCC  
AGCTGAAGATCCATCTTTTCGAGGAACCAAACCATTTGGATGCCCCACAGAGAAGCAAGACG  
AAGCATTCTATAATTTAGCGCGTATAAAAGCCCTGGACATCCTTGTCCGAAGAACACCA  
CCATCTTTTTTGTCCCAATTAACATATGACAATCCTCATGAGCCATGTAAC

**RNase Drel protein encoded by long mRNA**

>RNase\_Drelb

MKHCNWTMCLLTLQWPGSFCIGLTNKTICKIPLTIQNWTIHGLWPMHTGHCCNCWPIFH  
SHLQEIEPELTQLWPSLIKGHFFNFWRREEWIKHGTGAGCDGAMGSPLLYFQAQAVKLRKL  
FDINSVLESSGIKASCEVSYKYDDISKALTSLLGDNFDLQCVTDSKGREAWIQLKIHLSR  
NQTIGCPTEKQDEAFYNLAAYKSPGHPCPKNTTIFVPIYDNPHEPCN

### **RNase Dre2 mRNA**

>RNase\_Dre2

ACAGGCTGTTTGTACTGACAGGAAAGGAAGTGGCTTTAAAGTGACTCAACCGCACATCA  
TTTTTTTAAAGAAAGTCTGGGCAGATCTACTTCAGTCAGAGTTATACTAATAGGACGAAA  
GGAGAACTGTAACGTTATGTGAATTGGAGCGGCACCTTCAGACAATAACAGATTAAGTGT  
TTACTCTACCTGGAAACATGAGATTCATTGCATTTGCTGTCATCTTTAGTGCTGTATATC  
TTTGCTCATCAGCCTTTACCCATCCTCGGGGAGAATGGACAAAACCTTATACTGACCCAGC  
ATTGGCCACAGACATTTTGCAAAATGGAACACTGCAAAACAGATTTTCAGCTATTGGACTC  
TGCATGGATTATGGCCCAACACTGGTGTAAAGGTGCAACACATCTTGGCATTTTAATGCCA  
GTTTGATTGAGGACATACTACCAGAAATGGAGAAATTCTGGCCAGATCTGCTAGAACCAT  
CTTCCCCAAAATTTTGGAATTATGAATGGACGAAACACGGGACCTGTGCTGCAAAATCAG  
AGTCTTTAAACAGTGAACATAAGTACTTTGGCAAAGCTCTCGAACTCTACCACAAGTTTG  
ACCTTAACAGTGTGTTTGTGGAAGAATCAAATTGTGCCCTCTGAGAAGCATTACACGCTGG  
AGGATGTGGAGGAAGCCATTACAAGTGCCTACGGAGTAAAGCCCAAGATCCAGTGTGTCC  
ACCCAGGACAGGGAGGCCAGGTTCAAATTTGGGCCAAATAGAGATCTGTGTTGACAGGG  
ATTTCCAACACTGATGGGTTGTGAAAAGTCCAGCGAAGACACCTGGAGCAATGACCTCCCCA  
CAGTGCCTGTGAGTGGCCAGTCAGGACTCAGCGTGTGTGATCACTCCATGCCAGTCTATT  
ACCCACCGGTGCAAGCG

### **RNase Dre2 protein**

>RNase\_Dre2

MRFIAFAVIFSAVYLCSSAFTHPRGEWTKLILTQHWPQTFCKMEHCKTDFSYWTLHGLWP  
NTGVRCNTSWHFNASLIEDILPEMEKFWPDLLPSSPKFWNYEWTKHGTCAAKSESLNSE  
HKYFGKALELYHKFDLNSVLLKNQIVPSEKHYTELVVEAITSAYGVKPKIQCVHPGQGG  
QVQILGQIEICVDRDFQLMGCEKSSSEDTWSNDLPTVPVSGQSGLSVCDHSMPVYYPVQA
