# Supplementary material for: Zebrafish RNase T2 genes and the evolution of secretory ribonucleases in animals
Source: PubMed Central journal article supplement (PMC2720953; doi:10.1186/1471-2148-9-170), 2009-07-20
Supplement: 1471-2148-9-170-S2.pdf [file 1471-2148-9-170-S2.pdf]

**Supplementary table 1.** RNase T2 proteins used for phylogenetic analysis

| Name              | Accession #     | species                              | common name                  | CASII    | source           |
|-------------------|-----------------|--------------------------------------|------------------------------|----------|------------------|
| RNase T2          | P10281          | <i>Aspergillus oryzae</i>            | Koji-kin                     | H        | Protein          |
| RNase Rh          | P08056          | <i>Rhizopus niveus</i>               |                              | H        | Protein          |
| RNase Ddl         | XP_640939       | <i>Dictyostelium discoideum</i>      |                              | H        | Protein          |
| RNase LE          | P80022          | <i>Lycopersicon esculentum</i>       | tomato                       | H        | Protein          |
| RNS1              | P42813          | <i>Arabidopsis thaliana</i>          | thale-cress                  | H        | Protein          |
| omega-1           | ABB73002        | <i>Schistosoma mansoni</i>           |                              | H        | Protein          |
| RNase Ler1        | CV222118        | <i>Leucoraja erinacea</i>            | little skate                 | N        | EST              |
| RNase Atr1        | DR976433        | <i>Acipenser transmontanus</i>       | American sturgeon            | E        | EST              |
| RNase Ola1        | BJ501340        | <i>Oryzias latipes</i>               | medaka                       | Q        | EST              |
| <b>RNase Dre1</b> | <b>FJ460211</b> | <b><i>Danio rerio</i></b>            | <b>zebrafish</b>             | <b>E</b> | <b>this work</b> |
| RNase Ipu1        | CV994888        | <i>Ictalurus punctatus</i>           | channel catfish              | D        | EST              |
| RNase Sfo3        | EV387897        | <i>Salvelinus fontinalis</i>         | brook trout                  | D        | EST              |
| RNase Ssa1        | DW561904        | <i>Salmo salar</i>                   | Atlantic salmon              | D        | EST              |
| RNase Sfo1        | EV393106        | <i>Salvelinus fontinalis</i>         | brook trout                  | D        | EST              |
| RNase Omy1        | CA371032        | <i>Oncorhynchus mykiss</i>           | rainbow trout                | D        | EST              |
| RNase Spu2        | XP_780287       | <i>Strongylocentrotus purpuratus</i> | purple sea urchin            | H        | Protein          |
| RNase Ebu2        | BJ653399        | <i>Eptatretus burgeri</i>            | inshore hagfish              | Y        | EST              |
|                   | CO553054 +      |                                      |                              |          |                  |
| RNase Pma2        | CO552166        | <i>Petromyzon marinus</i>            | sea lamprey                  | H        | EST              |
| RNase Atr2        | DR976045        | <i>Acipenser transmontanus</i>       | American sturgeon            | H        | EST              |
| RNase Cca2        | EX822236        | <i>Cyprinus carpio</i>               | common carp                  | Y        | EST              |
| RNase Fhe2        | DR441730        | <i>Fundulus heteroclitus</i>         | killifish                    | Y        | EST              |
| RNase Omo2        | EL528012        | <i>Osmerus mordax</i>                | rainbow smelt                | Y        | EST              |
| RNase Gmo2        | EX741865        | <i>Gadus morhua</i>                  | Atlantic cod                 | Y        | EST              |
| RNase Tni2        | CAG05697        | <i>Tetraodon nigroviridis</i>        | spotted green pufferfish     | Y        | Protein          |
| RNase Tru2        | CA330011        | <i>Takifugu rubripes</i>             | fugu                         | Y        | EST              |
| RNase Gac2        | DW635779        | <i>Gasterosteus aculeatus</i>        | three-spined stickleback     | Y        | EST              |
| RNase Pcr2        | CX349007        | <i>Pseudosciaena crocea</i>          | large yellow croaker         | Y        | EST              |
| RNase Ok2         | BAB55596        | <i>Oncorhynchus keta</i>             | chum salmon                  | Y        | Protein          |
| RNase Ssa2        | EG914237        | <i>Salmo salar</i>                   | Atlantic salmon              | Y        | EST              |
| RNase Sfo2        | EV393679        | <i>Salvelinus fontinalis</i>         | brook trout                  | Y        | EST              |
| RNase Man2        | BJ820572        | <i>Misgurnus anguillicaudatus</i>    | oriental weatherfish         | Y        | EST              |
| <b>RNase Dre2</b> | <b>FJ460212</b> | <b><i>Danio rerio</i></b>            | <b>zebrafish</b>             | <b>Y</b> | <b>this work</b> |
| RNase Ppr2        | DT189242        | <i>Pimephales promelas</i>           | fathead minnow               | Y        | EST              |
| RNase Rru2        | EG548700        | <i>Rutilus rutilus</i>               | roach minnow                 | Y        | EST              |
| RNase Xla2        | NP_001086583    | <i>Xenopus laevis</i>                | African clawed frog          | H        | Protein          |
| RNase Sac2        | EG027303        | <i>Squalus acanthias</i>             | Dogfish Shark                | H        | EST              |
| RNase Gga2        | NP_001034580    | <i>Gallus gallus</i>                 | chicken                      | H        | Protein          |
| RNASET2           | NP_003721       | <i>Homo sapiens</i>                  | human                        | H        | Protein          |
| RNase Mmu2        | NP_001077407    | <i>Mus musculus</i>                  | mouse                        | H        | Protein          |
| RNase Mdo2        | XP_001381570    | <i>Monodelphis domestica</i>         | gray short-tailed opossum    | H        | Protein          |
| RNase Oan2        | EY201560        | <i>Ornithorhynchus anatinus</i>      | duck-billed platypus         | H        | EST              |
| RNase Cin2        | BW482808        | <i>Ciona intestinalis</i>            | Sea squirt                   | H        | EST              |
| RNase Bfl2        | BW708730        | <i>Branchiostoma floridae</i>        | Florida lancelet (Amphioxus) | H        | EST              |
| CeRNS             | NP_503370       | <i>Caenorhabditis elegans</i>        | nematode                     | H        | Protein          |
| RNase Bma1        | EDP29148        | <i>Brugia malayi</i>                 | filarial nematode            | H        | Protein          |
| DmRNase-66B       | CAA52884        | <i>Drosophila melanogaster</i>       | fruit fly                    | H        | Protein          |
| RNase Ahyl        | CAA47438        | <i>Aeromonas hydrophila</i>          |                              | H        | Protein          |
| RNase I           | NP_752630       | <i>Escherichia coli</i>              |                              | Y        | Protein          |
